# Supplementary material
Source: PubMed Central journal article supplement (PMC2981007)

Online Supporting Material

**Supplemental Table 1. Food items' distribution (PIN Study, NC. 2000-2005)**

| <b>Food item</b>                                  | <b>No consumption<br/>%</b> | <b>≤ Median<br/>%</b> | <b>&gt; Median<br/>%</b> |
|---------------------------------------------------|-----------------------------|-----------------------|--------------------------|
| <b>Vitamin C fruits</b>                           |                             |                       |                          |
| Oranges or tangerines                             | 27.2                        | 44.4                  | 28.5                     |
| Grapefruit <sup>1</sup>                           | 73.5                        |                       |                          |
| <b>Other fruits</b>                               |                             |                       |                          |
| Apples or pears                                   | 12.8                        | 44.2                  | 43.0                     |
| Bananas                                           | 13.2                        | 55.6                  | 31.2                     |
| Peaches or apricots                               | 42.9                        | 36.6                  | 20.5                     |
| Cantaloupe                                        | 35.9                        | 32.1                  | 32.0                     |
| Watermelon                                        | 53.4                        | 26.5                  | 20.2                     |
| Canned fruit                                      | 28.4                        | 46.4                  | 25.2                     |
| Strawberries                                      | 20.5                        | 46.0                  | 33.5                     |
| Other fruits                                      | 11.1                        | 48.1                  | 40.8                     |
| <b>Vegetables</b>                                 |                             |                       |                          |
| Green beans or peas                               | 8.9                         | 56.5                  | 34.6                     |
| Corn                                              | 9.2                         | 47.3                  | 43.5                     |
| Coleslaw or cabbage                               | 41.2                        | 33.0                  | 25.8                     |
| Green salad <sup>2</sup>                          |                             | 57.7                  | 42.3                     |
| White potatoes baked or mashed <sup>2</sup>       |                             | 61.6                  | 38.4                     |
| Other vegetables                                  | 26.4                        | 45.1                  | 28.5                     |
| <b>High-carotenoid vegetables</b>                 |                             |                       |                          |
| Raw tomatoes                                      | 20.9                        | 40.6                  | 38.5                     |
| Broccoli                                          | 14.2                        | 43.9                  | 41.9                     |
| Spinach                                           | 41.6                        | 33.2                  | 25.2                     |
| Greens (e.g. collards)                            | 65.9                        | 17.5                  | 16.6                     |
| Carrots                                           | 14.6                        | 43.3                  | 42.0                     |
| Sweet potatoes                                    | 57.7                        | 21.9                  | 20.4                     |
| <b>Dairy</b>                                      |                             |                       |                          |
| Cheese and cheese spreads <sup>2</sup>            |                             | 54.2                  | 45.8                     |
| Yogurt                                            | 29.6                        | 42.6                  | 27.8                     |
| Frozen yogurt                                     | 65.8                        | 19.0                  | 15.3                     |
| Low fat milk                                      | 26.5                        | 36.8                  | 36.7                     |
| Soy milk <sup>3</sup>                             | 0.98                        |                       |                          |
| Rice milk <sup>3</sup>                            | 1.00                        |                       |                          |
| <b>Nuts and beans</b>                             |                             |                       |                          |
| Peanut butter                                     | 22.4                        | 43.7                  | 33.9                     |
| Peanuts, other nuts and seeds                     | 27.2                        | 40.5                  | 32.3                     |
| Baked beans                                       | 29.1                        | 46.5                  | 24.4                     |
| Chili with beans                                  | 53.5                        | 29.3                  | 17.2                     |
| Refried beans or bean burritos                    | 43.0                        | 29.2                  | 27.8                     |
| <b>Mixed dish with meat</b>                       |                             |                       |                          |
| Vegetable stew                                    | 63.5                        | 19.8                  | 16.7                     |
| Spaghetti with tomato sauce and meat <sup>2</sup> |                             | 63.8                  | 36.2                     |
| Vegetable soup                                    | 31.0                        | 36.1                  | 32.9                     |
| Other soups (e.g. chicken noodles)                | 30.3                        | 36.1                  | 33.6                     |
| Mixed dishes with beef or pork                    | 51.5                        | 24.4                  | 24.0                     |

Online Supporting Material

| <b>Food item</b>                                   | <b>No consumption<br/>%</b> | <b>≤ Median<br/>%</b> | <b>&gt;Median<br/>%</b> |
|----------------------------------------------------|-----------------------------|-----------------------|-------------------------|
| Pasta salad or other pasta dish                    | 6.8                         | 47.0                  | 46.1                    |
| Chicken stew or pot pie                            | 19.6                        | 40.9                  | 39.5                    |
| <b>Eggs and meat</b>                               |                             |                       |                         |
| Eggs or egg biscuits <sup>2</sup>                  |                             | 64.4                  | 35.6                    |
| Beef (e.g. roast, steak, sandwiches)               | 24.9                        | 41.2                  | 33.9                    |
| Liver or liverwurst <sup>3</sup>                   | 0.92                        |                       |                         |
| Pork (e.g. chops, roasts, dinner ham)              | 28.6                        | 47.9                  | 23.5                    |
| Ribs or spareribs                                  | 67.7                        | 18.8                  | 13.5                    |
| Gizzard, neckbones or chitlins <sup>3</sup>        | 0.94                        |                       |                         |
| Fried chicken                                      | 40.9                        | 30.3                  | 28.9                    |
| Chicken not fried                                  | 10.5                        | 45.4                  | 44.0                    |
| Fried fish                                         | 61.6                        | 19.4                  | 19.0                    |
| Fish not fried                                     | 56.3                        | 26.1                  | 17.5                    |
| Tuna casserole or tuna sandwich                    | 47.9                        | 26.5                  | 25.5                    |
| Shellfish (e.g. shrimp, crab)                      | 32.1                        | 38.4                  | 29.4                    |
| Oysters <sup>3</sup>                               | 0.92                        |                       |                         |
| <b>Processed meat</b>                              |                             |                       |                         |
| Hot dogs or dinner sausage                         | 30.7                        | 38.7                  | 30.6                    |
| Ham (e.g. boloney, lunch meats)                    | 18.8                        | 49.6                  | 31.5                    |
| Bacon                                              | 24.4                        | 40.4                  | 35.2                    |
| Breakfast sausage                                  | 46.4                        | 27.2                  | 26.5                    |
| Rice or dishes with rice                           | 8.0                         | 50.0                  | 41.9                    |
| <b>Refined grains</b>                              |                             |                       |                         |
| White bread (e.g. French, Italian)                 | 14.8                        | 43.2                  | 42.0                    |
| Cornbread or hush puppies                          | 58.0                        | 23.8                  | 18.2                    |
| Cereal excluding fiber or fortified                | 21.7                        | 46.2                  | 32.1                    |
| Cooked cereal or grits                             | 36.7                        | 38.4                  | 25.0                    |
| Bagels, English muffins or buns <sup>2</sup>       |                             | 54.2                  | 45.8                    |
| Biscuits or muffins                                | 11.7                        | 53.9                  | 34.4                    |
| Pancakes or waffles                                | 16.7                        | 47.7                  | 35.6                    |
| Tortillas (corn or flour)                          | 31.7                        | 34.8                  | 33.5                    |
| <b>Whole grains</b>                                |                             |                       |                         |
| Whole wheat bread (e.g. dark, rye)                 | 29.8                        | 40.2                  | 30.0                    |
| High fiber cereals                                 | 51.8                        | 24.2                  | 24.0                    |
| Highly fortified cereals (e.g. Total) <sup>1</sup> | 85.9                        |                       |                         |
| <b>Salty snacks and sweets</b>                     |                             |                       |                         |
| Salty snacks (chips or popcorn) <sup>2</sup>       |                             | 58.3                  | 41.7                    |
| Crackers                                           | 14.2                        | 45.0                  | 40.8                    |
| Ice cream <sup>2</sup>                             |                             | 59.6                  | 40.4                    |
| Doughnuts or pastry                                | 30.5                        | 37.6                  | 31.9                    |
| Pumpkin pie or sweet potato pie <sup>1</sup>       | 81.9                        |                       |                         |
| Pie or cobbler                                     | 53.5                        | 33.2                  | 13.4                    |
| Chocolate candy or candy bars                      | 13.5                        | 50.1                  | 36.3                    |
| Candy (not chocolate)                              | 31.8                        | 35.9                  | 32.4                    |
| Pudding                                            | 62.4                        | 20.2                  | 17.4                    |
| Cookies                                            | 10.5                        | 51.2                  | 38.3                    |

## Online Supporting Material

| Food item                                          | No consumption<br>% | ≤ Median<br>% | >Median<br>% |
|----------------------------------------------------|---------------------|---------------|--------------|
| Cake                                               | 22.5                | 40.9          | 36.7         |
| Jelly, jam or syrup                                | 16.4                | 42.0          | 41.6         |
| <b>Beverages</b>                                   |                     |               |              |
| Orange juice or grapefruit juice                   | 8.3                 | 46.8          | 44.8         |
| Tomato juice or V-8 juice <sup>1</sup>             | 81.1                |               |              |
| Real fruit juice excluding orange and grapefruit   | 18.8                | 40.8          | 40.4         |
| Coffee                                             | 49.9                | 25.8          | 24.3         |
| Alcohol <sup>1</sup>                               | 90.5                |               |              |
| Light beer <sup>3</sup>                            | 0.99                |               |              |
| Non-alcoholic beer <sup>3</sup>                    | 0.93                |               |              |
| Drinks with some juice (e.g. Sunny D) <sup>1</sup> | 73.5                |               |              |
| Vitamin C rich drinks (e.g. Hi-C)                  | 56.2                | 23.6          | 20.2         |
| Not diet soft drinks or Snapple                    | 24.4                | 40.2          | 35.4         |
| Tea or iced tea (not herb tea)                     | 33.3                | 34.9          | 31.8         |
| Cranberry juice cocktail                           | 54.6                | 23.0          | 22.3         |
| Diet soft drinks <sup>1</sup>                      | 69.1                |               |              |
| Breakfast or diet shakes <sup>3</sup>              | 0.91                |               |              |
| Water <sup>2</sup>                                 |                     | 57.4          | 42.6         |
| <b>Fast food</b>                                   |                     |               |              |
| French fries or fried potatoes <sup>2</sup>        |                     | 58.3          | 41.7         |
| Hamburger or cheeseburger                          | 10.4                | 45.2          | 44.4         |
| Pizza <sup>2</sup>                                 |                     | 62.4          | 37.6         |
| Cheese dish like macaroni and cheese               | 15.9                | 43.7          | 40.5         |
| Chinese dishes                                     | 22.6                | 38.8          | 38.5         |
| Tacos or burritos                                  | 21.1                | 44.3          | 34.6         |
| <b>Condiments and other food items</b>             |                     |               |              |
| Butter                                             | 34.6                | 39.5          | 25.9         |
| Margarine                                          | 39.5                | 33.3          | 27.2         |
| Gravy                                              | 53.9                | 25.4          | 20.8         |
| Mayonnaise or sandwich spreads                     | 24.2                | 48.1          | 27.7         |
| Salad dressing                                     | 7.9                 | 56.2          | 36.0         |
| Salsa, ketchup or taco sauce                       | 15.2                | 47.2          | 37.6         |
| Mustard, BBQ sauce or other sauce                  | 13.7                | 44.0          | 42.3         |
| Cream or half and half <sup>1</sup>                | 80.3                |               |              |
| Non dairy creamer <sup>3</sup>                     | 0.94                |               |              |
| Sugar or honey in coffee or tea                    | 43.2                | 28.7          | 28.1         |
| Breakfast bars or Power bars                       | 46.3                | 28.5          | 25.2         |
| Meat substitutes (not just soy) <sup>1</sup>       | 76.7                |               |              |

<sup>1</sup> Food-items were dichotomized as consumed or not because there were too few consumers; only percent of non consumers shown.

<sup>2</sup> Food-items were dichotomized as below or above the median because there were too few non consumers.

<sup>3</sup> Food-items were rarely consumed (<10% consumption) and were not included in EFA, CFA and LCA because they did not add any useful information.

## Online Supporting Material

**Supplemental Table 2. Selected Software for Latent Class Analysis**

|                                                         | <b>macro PROC<br/>LCA<sup>1</sup></b>                | <b>GLLAMM<sup>1</sup></b>                           | <b>Mplus</b>                        |
|---------------------------------------------------------|------------------------------------------------------|-----------------------------------------------------|-------------------------------------|
| <b>Acronym</b>                                          | Latent class analysis                                | Generalized Linear Latent And Mixed Models          | -                                   |
| <b>Version</b>                                          | 1.2.5 beta                                           | -                                                   | 6.0                                 |
| <b>Date of release</b>                                  | Jan-2010                                             | Nov-06                                              | Apr-2010                            |
| <b>Authors</b>                                          | Lanza ST,<br>Lemmon DR,<br>Schafer JL,<br>Collins LM | Rabe-Hesketh S,<br>Skrondal A                       | Muthen LK,<br>Muthen BO             |
| <b>Institution</b>                                      | The Methodology Center,<br>Penn State University     | Biostatistics, University of California at Berkeley | Muthen and Muthen                   |
| <b>Free<sup>2</sup></b>                                 | Y                                                    | Y                                                   | N                                   |
| <b>Software</b>                                         | SAS                                                  | STATA                                               | Stand-alone                         |
| <b>Outcomes</b>                                         |                                                      |                                                     |                                     |
| <b>Nominal</b>                                          | Y                                                    | Y                                                   | Y                                   |
| <b>Ordinal</b>                                          | N                                                    | Y                                                   | Y                                   |
| <b>Count</b>                                            | N                                                    | Y                                                   | Y                                   |
| <b>Continuous</b>                                       | N                                                    | Y                                                   | Y                                   |
| <b>Different scales jointly</b>                         | N                                                    | N                                                   | Y                                   |
| <b>Covariates</b>                                       | Y                                                    | Y                                                   | Y                                   |
| <b>Allows factors and latent classes simultaneously</b> | N                                                    | N                                                   | Y                                   |
| <b>Tests to determine number of classes</b>             | N                                                    | N                                                   | Lo-Mendell-Rubin LRT, Bootstrap LRT |
| <b>Ease of use</b>                                      | Medium                                               | Difficult                                           | Difficult                           |

<sup>1</sup> These procedures are macros developed, documented and maintained by users and are not part of the software.

<sup>2</sup> However SAS and STATA software is not free.

Online Supporting Material

**Supplemental Table 3. Exploratory and Confirmatory Factor Loadings for 4-Factor Model (PIN Study, NC. 2000-2005)**<sup>1,2,3,4</sup>

| Food item                              | FA-Prudent |      | FA-Southern |       | FA-Western |       | FA-Prudent coffee and alcohol |      | <i>R</i> <sup>2</sup> |
|----------------------------------------|------------|------|-------------|-------|------------|-------|-------------------------------|------|-----------------------|
|                                        | EFA        | CFA  | EFA         | CFA   | EFA        | CFA   | EFA                           | CFA  |                       |
| Oranges or tangerines                  | 0.47       | 0.49 |             |       |            |       |                               |      | 0.23                  |
| Grapefruit                             | 0.42       | 0.52 |             |       |            |       |                               |      | 0.25                  |
| Apples or pears                        | 0.45       | 0.51 |             |       |            |       |                               |      | 0.24                  |
| Bananas                                | 0.29       | 0.36 |             |       |            |       |                               |      | 0.13                  |
| Peaches or apricots                    |            |      |             |       |            |       | 0.29                          | 0.47 | 0.20                  |
| Cantaloupe                             |            |      |             |       |            |       | 0.32                          | 0.44 | 0.19                  |
| Watermelon                             |            |      |             |       |            |       | 0.26                          | 0.29 | 0.08                  |
| Canned fruit                           | 0.43       | 0.39 |             |       |            |       |                               |      | 0.15                  |
| Strawberries                           |            |      |             |       |            |       | 0.34                          | 0.41 | 0.16                  |
| Other fruits                           | 0.33       | 0.24 |             |       |            |       | 0.32                          | 0.33 | 0.23                  |
| Green beans or peas                    | 0.27       | 0.28 | 0.27        | 0.24  |            |       |                               |      | 0.12                  |
| Corn                                   |            |      | 0.35        | 0.38  |            |       |                               |      | 0.14                  |
| Coleslaw or cabbage                    |            |      | 0.50        | 0.46  |            |       |                               |      | 0.20                  |
| Green salad                            |            |      |             |       |            |       | 0.66                          | 0.70 | 0.42                  |
| White potatoes                         |            |      | 0.32        | 0.27  | 0.31       | 0.23  |                               |      | 0.16                  |
| Other vegetables                       | 0.34       | 0.27 |             |       |            |       | 0.41                          | 0.33 | 0.25                  |
| Raw tomatoes                           |            |      |             |       |            |       | 0.54                          | 0.65 | 0.37                  |
| Broccoli                               | 0.35       | 0.30 |             |       |            |       | 0.40                          | 0.35 | 0.29                  |
| Spinach                                | 0.36       | 0.25 |             |       |            |       | 0.50                          | 0.47 | 0.35                  |
| Greens like collards                   |            |      | 0.51        | 0.41  | -0.31      | -0.19 |                               |      | 0.14                  |
| Carrots                                | 0.41       | 0.40 |             |       |            |       | 0.37                          | 0.26 | 0.30                  |
| Sweet potatoes                         | 0.51       | 0.57 |             |       |            |       |                               |      | 0.30                  |
| Cheese and cheese spreads <sup>3</sup> | 0.13       |      | -0.10       |       | 0.19       |       | 0.11                          |      |                       |
| Yogurt                                 | 0.36       | 0.36 | -0.31       | -0.25 |            |       | 0.38                          | 0.29 | 0.36                  |
| Frozen yogurt                          | 0.25       | 0.39 |             |       |            |       |                               |      | 0.15                  |
| Low fat milk                           |            |      | -0.41       | -0.27 |            |       |                               |      | 0.07                  |
| Peanut butter                          |            |      |             |       | 0.32       | 0.27  |                               |      | 0.07                  |
| Peanuts, other nuts or seeds           | 0.36       | 0.50 |             |       |            |       |                               |      | 0.24                  |
| Baked beans                            | 0.40       | 0.43 |             |       |            |       |                               |      | 0.18                  |
| Chili with beans                       | 0.41       | 0.46 |             |       |            |       |                               |      | 0.20                  |
| Refried beans or bean burritos         | 0.31       | 0.46 |             |       |            |       |                               |      | 0.20                  |
| Vegetable stew                         | 0.50       | 0.51 |             |       |            |       |                               |      | 0.24                  |
| Spaghetti with tomato sauce and meat   |            |      |             |       | 0.30       | 0.23  |                               |      | 0.05                  |
| Vegetable soup                         | 0.49       | 0.54 |             |       |            |       |                               |      | 0.27                  |
| Other soups (e.g. chicken noodle)      | 0.41       | 0.43 |             |       |            |       |                               |      | 0.18                  |
| Mixed dishes with beef or pork         |            |      | 0.35        | 0.52  |            |       |                               |      | 0.24                  |
| Pasta salad or other pasta dish        |            |      |             |       | 0.45       | 0.39  |                               |      | 0.14                  |
| Chicken stew (e.g. pot pie)            |            |      |             |       | 0.38       | 0.49  |                               |      | 0.22                  |
| Eggs or egg biscuits <sup>3</sup>      | 0.09       |      | 0.22        |       | -0.03      |       | 0.12                          |      |                       |
| Beef (e.g. roast, steak, sandwiches)   |            |      | 0.46        | 0.61  |            |       |                               |      | 0.33                  |
| Pork (e.g. chops, roasts, dinner ham)  |            |      | 0.50        | 0.63  |            |       |                               |      | 0.34                  |
| Ribs or spareribs                      |            |      | 0.58        | 0.62  |            |       |                               |      | 0.33                  |
| Fried chicken                          |            |      | 0.63        | 0.73  |            |       |                               |      | 0.44                  |

Online Supporting Material

| Food item                                        | FA-Prudent |      | FA-Southern |       | FA-Western |      | FA-Prudent coffee and alcohol |       | $R^2$ |
|--------------------------------------------------|------------|------|-------------|-------|------------|------|-------------------------------|-------|-------|
|                                                  | EFA        | CFA  | EFA         | CFA   | EFA        | CFA  | EFA                           | CFA   |       |
| Fried fish                                       |            |      | 0.48        | 0.46  |            |      |                               |       | 0.20  |
| Chicken not fried                                |            |      |             |       |            |      | 0.36                          | 0.29  | 0.08  |
| Tuna casserole or tuna sandwich                  |            |      |             |       |            |      | 0.33                          | 0.44  | 0.18  |
| Shellfish (e.g. shrimp, crab)                    |            |      |             |       |            |      | 0.39                          | 0.39  | 0.14  |
| Fish not fried                                   |            |      |             |       |            |      | 0.56                          | 0.67  | 0.39  |
| Hot dogs or dinner sausage                       |            |      | 0.55        | 0.66  |            |      |                               |       | 0.37  |
| Ham (e.g. boloney, lunch meats)                  |            |      | 0.28        | 0.36  |            |      |                               |       | 0.12  |
| Bacon                                            |            |      | 0.53        | 0.69  |            |      |                               |       | 0.40  |
| Breakfast sausage                                |            |      | 0.56        | 0.65  |            |      |                               |       | 0.36  |
| Rice or dishes with rice                         |            |      |             |       |            |      | 0.27                          | 0.34  | 0.11  |
| White bread (e.g. French or Italian)             |            |      | 0.40        | 0.48  |            |      |                               |       | 0.21  |
| Cornbread or hush puppies                        | 0.37       | 0.32 | 0.32        | 0.45  |            |      |                               |       | 0.26  |
| Cereal excluding fiber or fortified <sup>3</sup> | 0.06       |      | 0.05        |       | 0.23       |      | -0.10                         |       |       |
| Cooked cereal or grits                           | 0.36       | 0.37 |             |       |            |      |                               |       | 0.13  |
| Bagels (e.g. English muffins and buns)           |            |      |             |       | 0.44       | 0.35 |                               |       | 0.12  |
| Biscuits or muffins                              |            |      |             |       | 0.36       | 0.49 |                               |       | 0.21  |
| Pancakes or waffles                              |            |      |             |       | 0.31       | 0.41 |                               |       | 0.16  |
| Tortillas (corn or flour)                        |            |      |             |       | 0.41       | 0.35 |                               |       | 0.11  |
| Whole wheat bread (e.g. dark, rye)               | 0.33       | 0.35 | -0.42       | -0.36 |            |      | 0.43                          | 0.29  | 0.40  |
| High fiber cereals                               | 0.30       | 0.40 |             |       |            |      |                               |       | 0.15  |
| Highly fortified cereals (e.g. Total)            | 0.30       | 0.40 |             |       |            |      |                               |       | 0.15  |
| Salty snacks (e.g. chips or popcorn)             |            |      |             |       | 0.44       | 0.35 |                               |       | 0.12  |
| Crackers                                         |            |      |             |       | 0.38       | 0.34 |                               |       | 0.11  |
| Ice cream                                        |            |      |             |       | 0.41       | 0.37 |                               |       | 0.13  |
| Doughnuts or pastry                              |            |      |             |       | 0.43       | 0.60 |                               |       | 0.31  |
| Pumpkin pie or sweet potato pie                  | 0.42       | 0.33 |             |       |            |      |                               |       | 0.11  |
| Pie or cobbler                                   |            |      |             |       | 0.29       | 0.55 |                               |       | 0.27  |
| Chocolate candy or candy bars                    |            |      |             |       | 0.48       | 0.45 |                               |       | 0.19  |
| Candy (not chocolate)                            |            |      |             |       | 0.40       | 0.40 |                               |       | 0.15  |
| Pudding <sup>3</sup>                             | 0.23       |      | 0.16        |       | 0.24       |      | -0.11                         |       |       |
| Cookies                                          |            |      |             |       | 0.45       | 0.39 |                               |       | 0.14  |
| Cake                                             |            |      |             |       | 0.39       | 0.54 |                               |       | 0.26  |
| Jelly, jam or syrup                              |            |      |             |       | 0.33       | 0.37 |                               |       | 0.13  |
| Orange juice or grapefruit juice <sup>3</sup>    | 0.13       |      | 0.05        |       | 0.00       |      | 0.01                          |       |       |
| Tomato juice or V-8 juice                        |            |      |             |       |            |      | 0.25                          | 0.38  | 0.14  |
| Real fruit juice excluding orange and grapefruit |            |      | 0.25        | 0.11  |            |      |                               |       | 0.01  |
| Coffee                                           |            |      |             |       |            |      | 0.36                          | 0.30  | 0.09  |
| Alcohol                                          |            |      |             |       |            |      | 0.32                          | 0.20  | 0.04  |
| Drinks with some juice (e.g. Sunny D)            |            |      | 0.47        | 0.46  |            |      |                               |       | 0.20  |
| Vitamin C rich drinks (e.g. Hi-C)                |            |      | 0.53        | 0.40  |            |      | -0.38                         | -0.19 | 0.19  |
| Not diet soft drinks                             |            |      | 0.26        | 0.25  |            |      |                               |       | 0.06  |
| Tea or iced tea (not herb tea)                   |            |      | 0.38        | 0.23  |            |      |                               |       | 0.05  |
| Cranberry juice cocktail                         | 0.26       | 0.27 |             |       |            |      |                               |       | 0.07  |
| Diet soft drinks <sup>3</sup>                    | -0.08      |      | -0.11       |       | 0.11       |      | 0.20                          |       |       |
| French fries or fried potatoes                   |            |      | 0.40        | 0.40  | 0.34       | 0.12 |                               |       | 0.20  |

Online Supporting Material

| Food item                            | FA-Prudent |      | FA-Southern |       | FA-Western |      | FA-Prudent coffee and alcohol |      | <i>R</i> <sup>2</sup> |
|--------------------------------------|------------|------|-------------|-------|------------|------|-------------------------------|------|-----------------------|
|                                      | EFA        | CFA  | EFA         | CFA   | EFA        | CFA  | EFA                           | CFA  |                       |
| Hamburger or cheeseburger            |            |      | 0.50        | 0.67  | 0.34       | 0.03 |                               |      | 0.39                  |
| Pizza                                |            |      |             |       | 0.48       | 0.38 |                               |      | 0.14                  |
| Cheese dish like macaroni and cheese |            |      |             |       | 0.41       | 0.44 |                               |      | 0.18                  |
| Chinese dishes                       |            |      |             |       |            |      | 0.27                          | 0.33 | 0.10                  |
| Tacos or burritos                    |            |      |             |       | 0.49       | 0.52 |                               |      | 0.25                  |
| Butter <sup>3</sup>                  | 0.10       |      | 0.11        |       | 0.08       |      | 0.13                          |      |                       |
| Margarine                            |            |      | 0.26        | 0.26  | 0.26       | 0.16 |                               |      | 0.12                  |
| Gravy                                |            |      | 0.54        | 0.68  |            |      |                               |      | 0.39                  |
| Mayonnaise or sandwich spreads       |            |      | 0.34        | 0.28  |            |      |                               |      | 0.08                  |
| Salad dressing                       |            |      |             |       |            |      | 0.53                          | 0.52 | 0.25                  |
| Water                                |            |      |             |       |            |      | 0.27                          | 0.36 | 0.13                  |
| Salsa, ketchup or taco sauce         |            |      |             |       | 0.42       | 0.52 |                               |      | 0.24                  |
| Mustard, BBQ sauce or other sauce    |            |      |             |       | 0.38       | 0.47 |                               |      | 0.20                  |
| Cream or half and half               |            |      |             |       |            |      | 0.32                          | 0.20 | 0.04                  |
| Sugar or honey in coffee or tea      |            |      | 0.38        | 0.20  |            |      |                               |      | 0.04                  |
| Breakfast bars or Power bars         | 0.27       | 0.33 |             |       |            |      |                               |      | 0.11                  |
| Meat substitutes (not just soy)      | 0.40       | 0.56 | -0.52       | -0.54 |            |      |                               |      | 0.53                  |

<sup>1</sup> The confirmatory 4-factor model was adjusted for energy intake, nulliparous, smoker, white, education and age. It included correlated errors between coffee and half & half, and iced tea and sugar or honey. Some factors were correlated;  $r=0.49$  between 'FA-Southern' and 'FA-Western',  $0.38$  between 'FA-Prudent' and 'FA-Prudent with coffee and alcohol' and  $r=0.17$  between 'FA-Prudent' and 'FA-Western'.

<sup>2</sup> Sample size was 1,285 women for EFA and 1,219 women for CFA due to missing values in some covariates.

<sup>3</sup> Food-items with EFA loadings  $< 0.25$  for all factors were excluded from CFA and LCA.

<sup>4</sup> For EFA only factor loadings  $\geq 0.25$  are presented.

Online Supporting Material

**Supplemental Table 4. Regression Coefficients for 4-Factor Model (PIN Study, NC. 2000-2005)**

| Covariate     | FA-Prudent |          | FA-Southern |          | FA-Western |          | FA-Prudent with coffee and alcohol |          |
|---------------|------------|----------|-------------|----------|------------|----------|------------------------------------|----------|
|               | Estimate   | P-value  | Estimate    | P-value  | Estimate   | P-value  | Estimate                           | P-value  |
| Nulliparous   | 0.13       | < 0.0001 | -0.12       | < 0.0001 | -0.07      | 0.011    | 0.03                               | 0.311    |
| Smoker        | -0.17      | 0.004    | 0.19        | < 0.0001 | -0.13      | 0.007    | -0.07                              | 0.135    |
| White         | 0.15       | < 0.0001 | -0.23       | < 0.0001 | 0.37       | < 0.0001 | 0.00                               | 0.890    |
| Age, y        |            |          |             |          |            |          |                                    |          |
| 25-29         | 0.14       | 0.006    | 0.01        | 0.806    | 0.06       | 0.158    | 0.24                               | < 0.0001 |
| 30-34         | 0.21       | < 0.0001 | -0.06       | 0.116    | 0.04       | 0.356    | 0.37                               | < 0.0001 |
| 35-47         | 0.18       | 0.002    | -0.03       | 0.492    | -0.06      | 0.255    | 0.41                               | < 0.0001 |
| Education     |            |          |             |          |            |          |                                    |          |
| Grades 13-16  | 0.12       | 0.020    | -0.13       | 0.001    | 0.21       | < 0.0001 | 0.20                               | < 0.0001 |
| ≥ Grade 17    | 0.22       | < 0.0001 | -0.25       | < 0.0001 | 0.16       | 0.002    | 0.36                               | < 0.0001 |
| Pregravid BMI |            |          |             |          |            |          |                                    |          |
| Underweight   | 0.07       | 0.105    | -0.09       | 0.013    | -0.07      | 0.067    | -0.06                              | 0.139    |
| Overweight    | -0.13      | 0.011    | 0.11        | 0.015    | 0.02       | 0.649    | -0.01                              | 0.795    |
| Obese         | -0.06      | 0.143    | 0.14        | < 0.0001 | -0.02      | 0.645    | -0.13                              | < 0.0001 |
| Energy intake |            |          |             |          |            |          |                                    |          |
| 2nd quartile  | 0.18       | < 0.0001 | 0.13        | < 0.0001 | 0.30       | < 0.0001 | 0.15                               | < 0.0001 |
| 3rd quartile  | 0.31       | < 0.0001 | 0.28        | < 0.0001 | 0.51       | < 0.0001 | 0.25                               | < 0.0001 |
| 4th quartile  | 0.42       | < 0.0001 | 0.44        | < 0.0001 | 0.79       | < 0.0001 | 0.33                               | < 0.0001 |



Online Supporting Material

**Supplemental Table 5. Partial Spearman correlations between factors and daily dietary nutrient intake, adjusted by energy intake (PIN Study, NC. 2000-2005)**

| Nutrient                              | FA-Prudent with |             |                    |            |
|---------------------------------------|-----------------|-------------|--------------------|------------|
|                                       | FA-Prudent      | FA-Southern | coffee and alcohol | FA-Western |
| Fat, <i>g</i>                         | -0.11           | 0.17        | 0.04               | 0.21       |
| Saturated fat, <i>g</i>               | -0.21           | 0.21        | -0.09              | 0.11       |
| Cholesterol, <i>mg</i>                | -0.12           | 0.29        | 0.03               | -0.04      |
| (n-3) fatty acids, <i>g</i>           | 0.02            | 0.03        | 0.21               | 0.14       |
| Fiber, <i>g</i>                       | 0.64            | -0.46       | 0.52               | 0.01       |
| Iron, <i>mg</i>                       | 0.27            | -0.25       | 0.23               | 0.06       |
| Folate, $\mu\text{g}$                 | 0.47            | -0.40       | 0.41               | -0.01      |
| Calcium, <i>mg</i>                    | 0.26            | -0.39       | 0.21               | -0.08      |
| Vitamin D <sup>1</sup> , <i>IU</i>    | 0.09            | -0.15       | 0.08               | -0.12      |
| Vitamin A, <i>retinol equivalents</i> | 0.57            | -0.30       | 0.54               | -0.02      |
| Vitamin E, <i>mg</i>                  | 0.39            | -0.31       | 0.47               | 0.14       |
| Zinc, <i>mg</i>                       | 0.35            | -0.23       | 0.35               | 0.04       |
| $\alpha$ -carotene, $\mu\text{g}$     | 0.53            | -0.23       | 0.40               | 0.03       |
| $\beta$ -carotene, $\mu\text{g}$      | 0.55            | -0.21       | 0.53               | -0.03      |
| Fat, % energy                         | -0.13           | 0.18        | 0.03               | 0.20       |
| Protein, % energy                     | 0.26            | -0.22       | 0.38               | 0.03       |
| Carbohydrates, % energy               | 0.09            | -0.12       | -0.11              | -0.17      |
| Sweets, % energy                      | -0.17           | 0.15        | -0.20              | 0.20       |
| Alcohol, % energy                     | 0.04            | -0.06       | 0.17               | 0.06       |
| Foods consumed, <i>n</i>              | 0.61            | 0.31        | 0.45               | 0.54       |

<sup>1</sup> Vitamin D: 40 IU = 1  $\mu\text{g}$

# Online Supporting Material

**Supplemental Figure 1. Probabilities of consumption for ALL food-items by dietary patterns derived using latent class analysis (PIN Study, NC. 2000-2005). Values are estimated probabilities.**

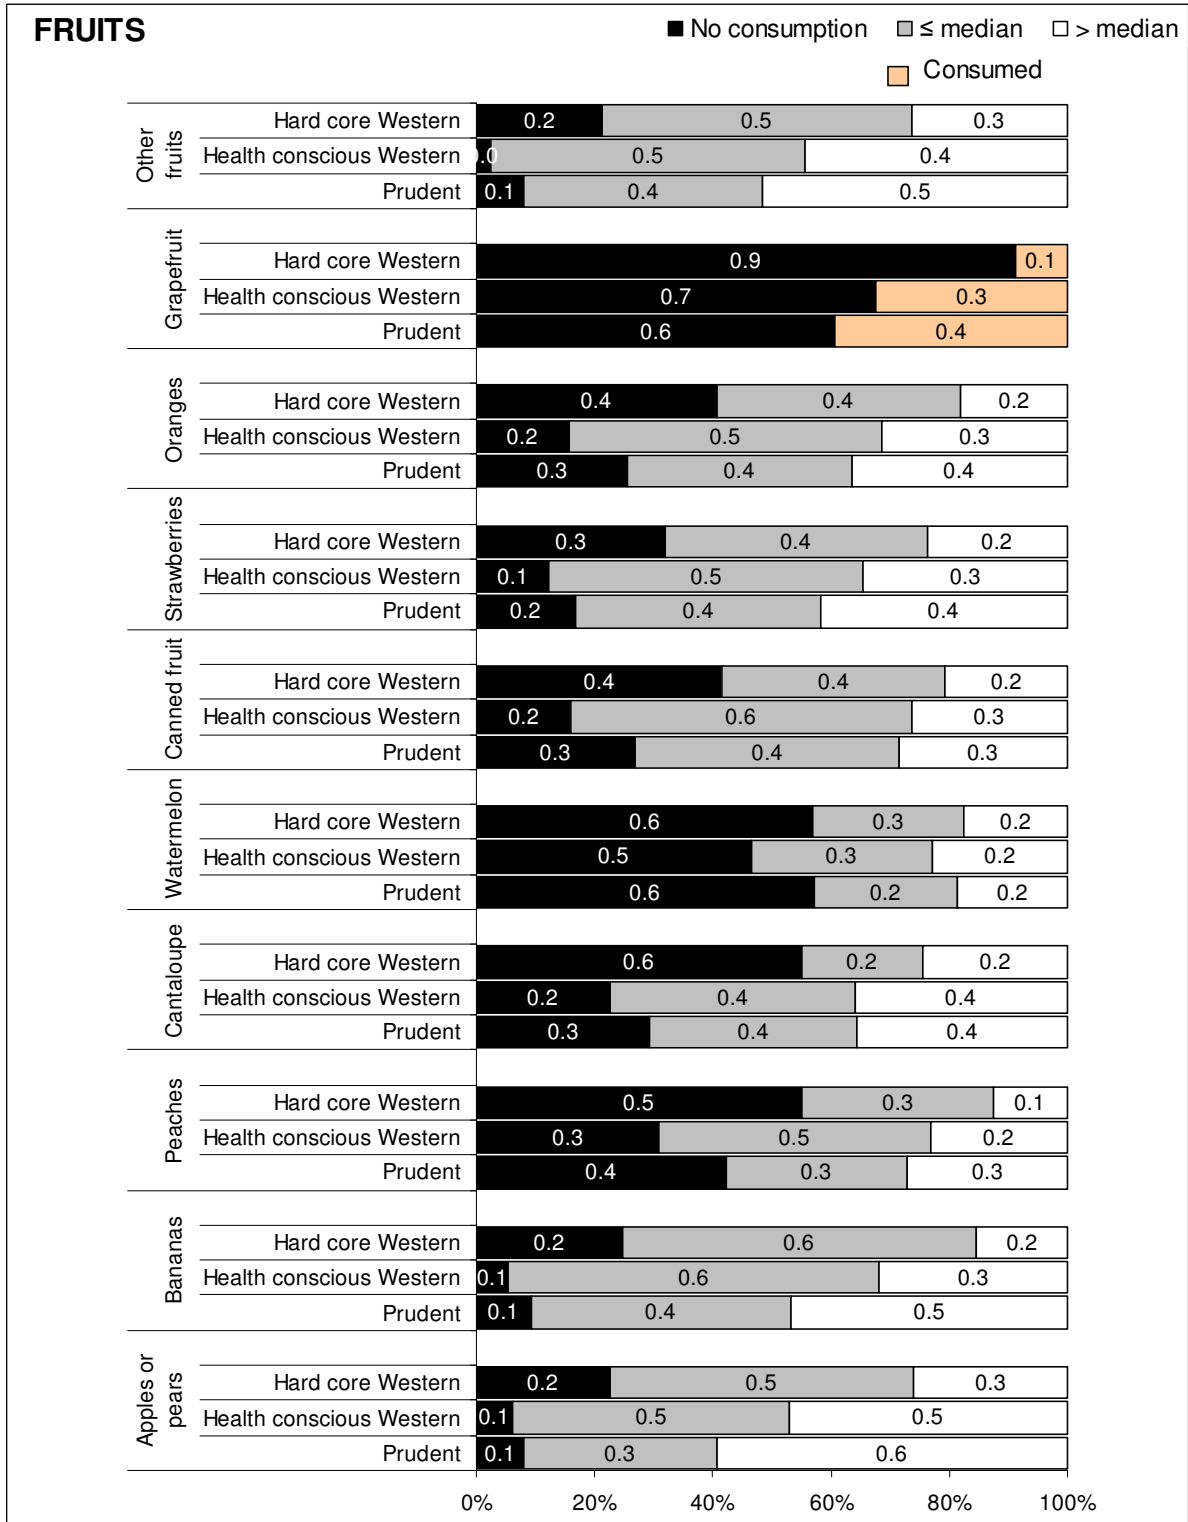

# Online Supporting Material

## HIGH-CARATENOID VEGETABLES

■ No consumption    ■ ≤ median    □ > median

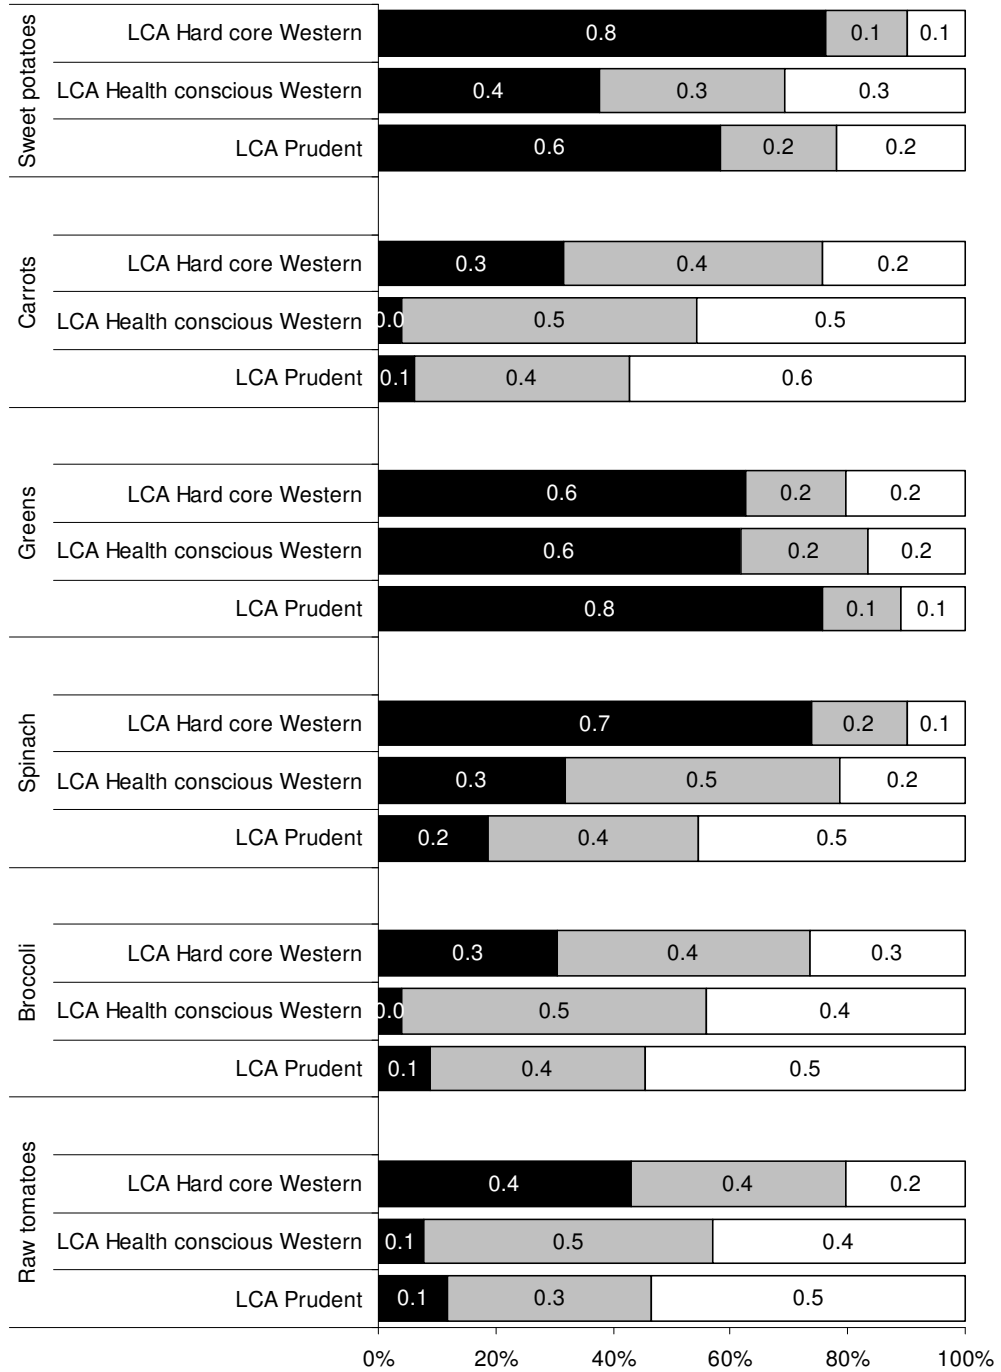

# Online Supporting Material

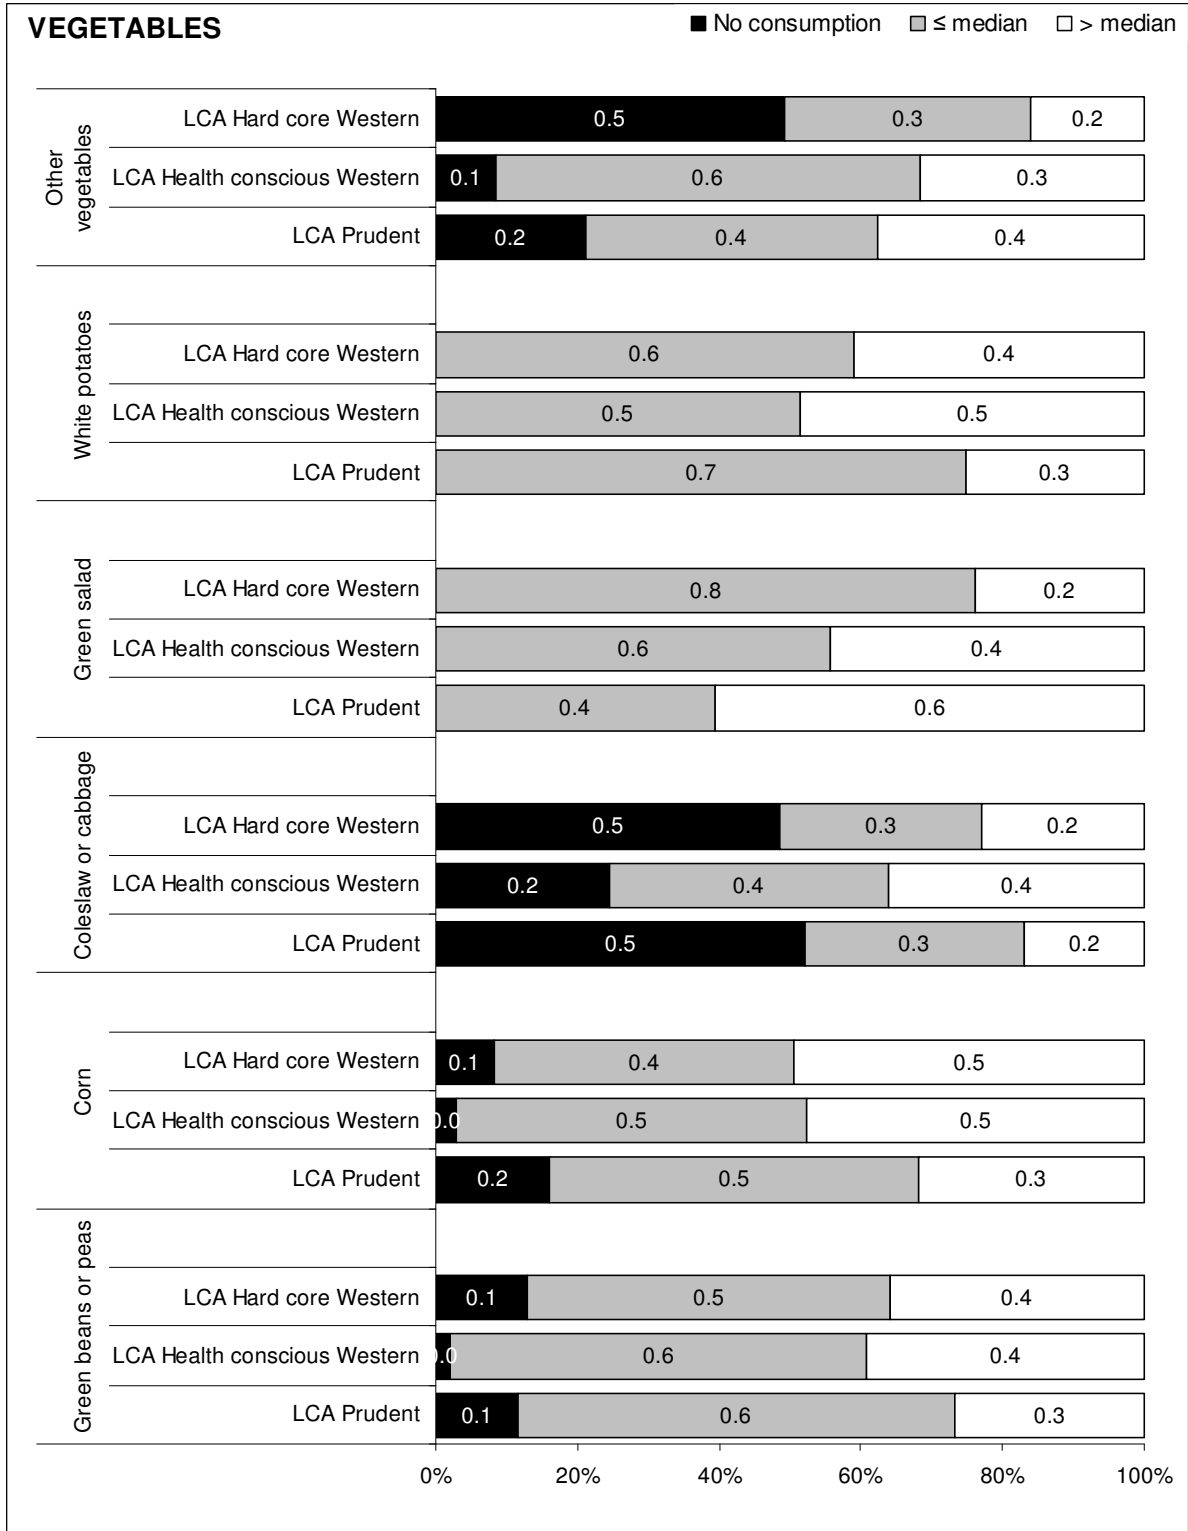

# Online Supporting Material

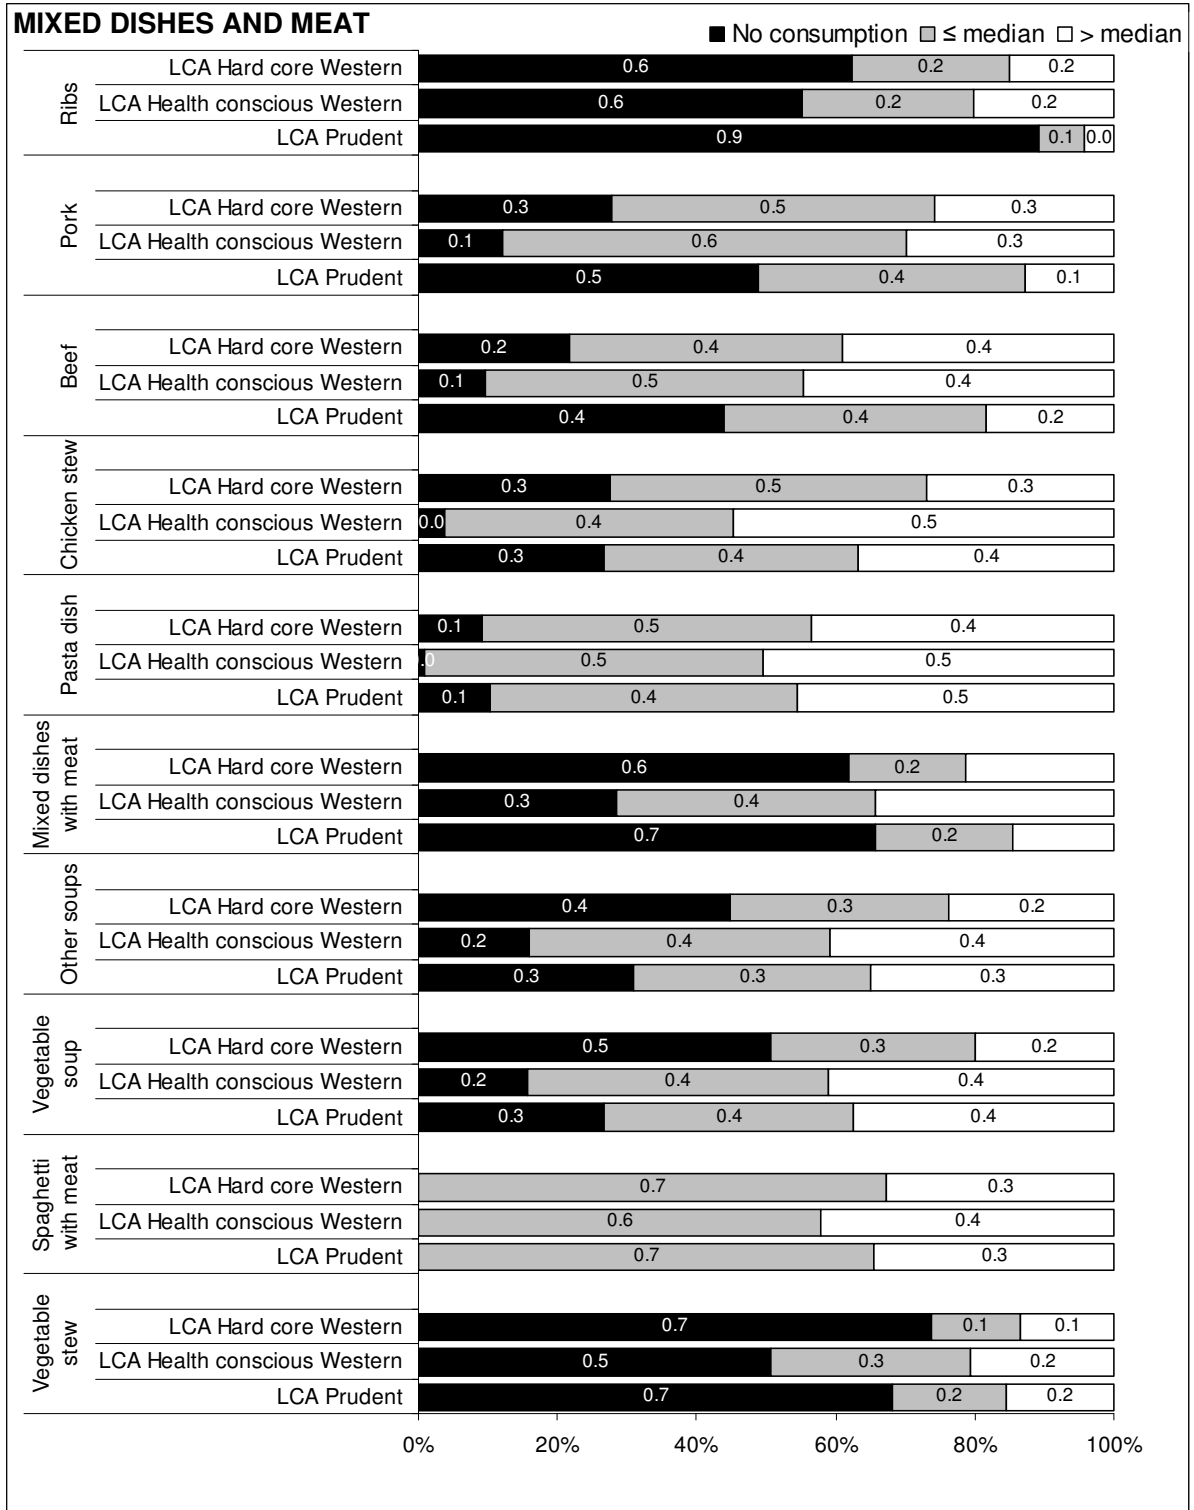

# Online Supporting Material

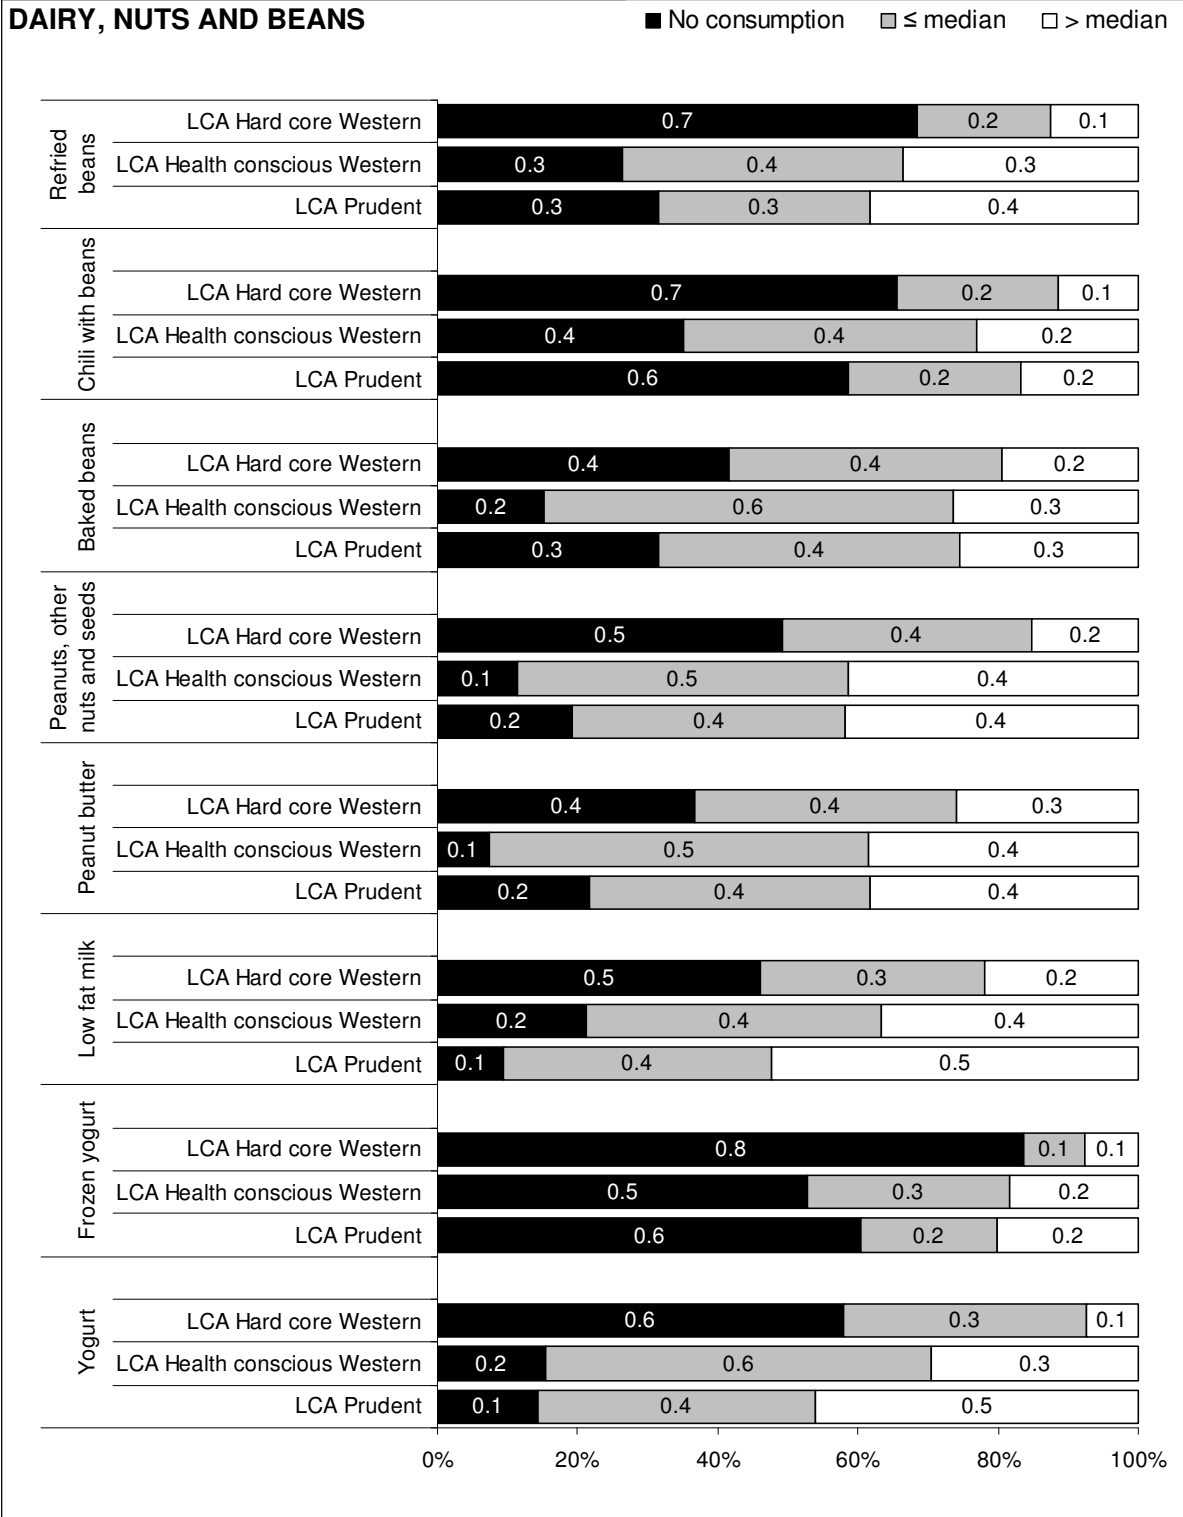

# Online Supporting Material

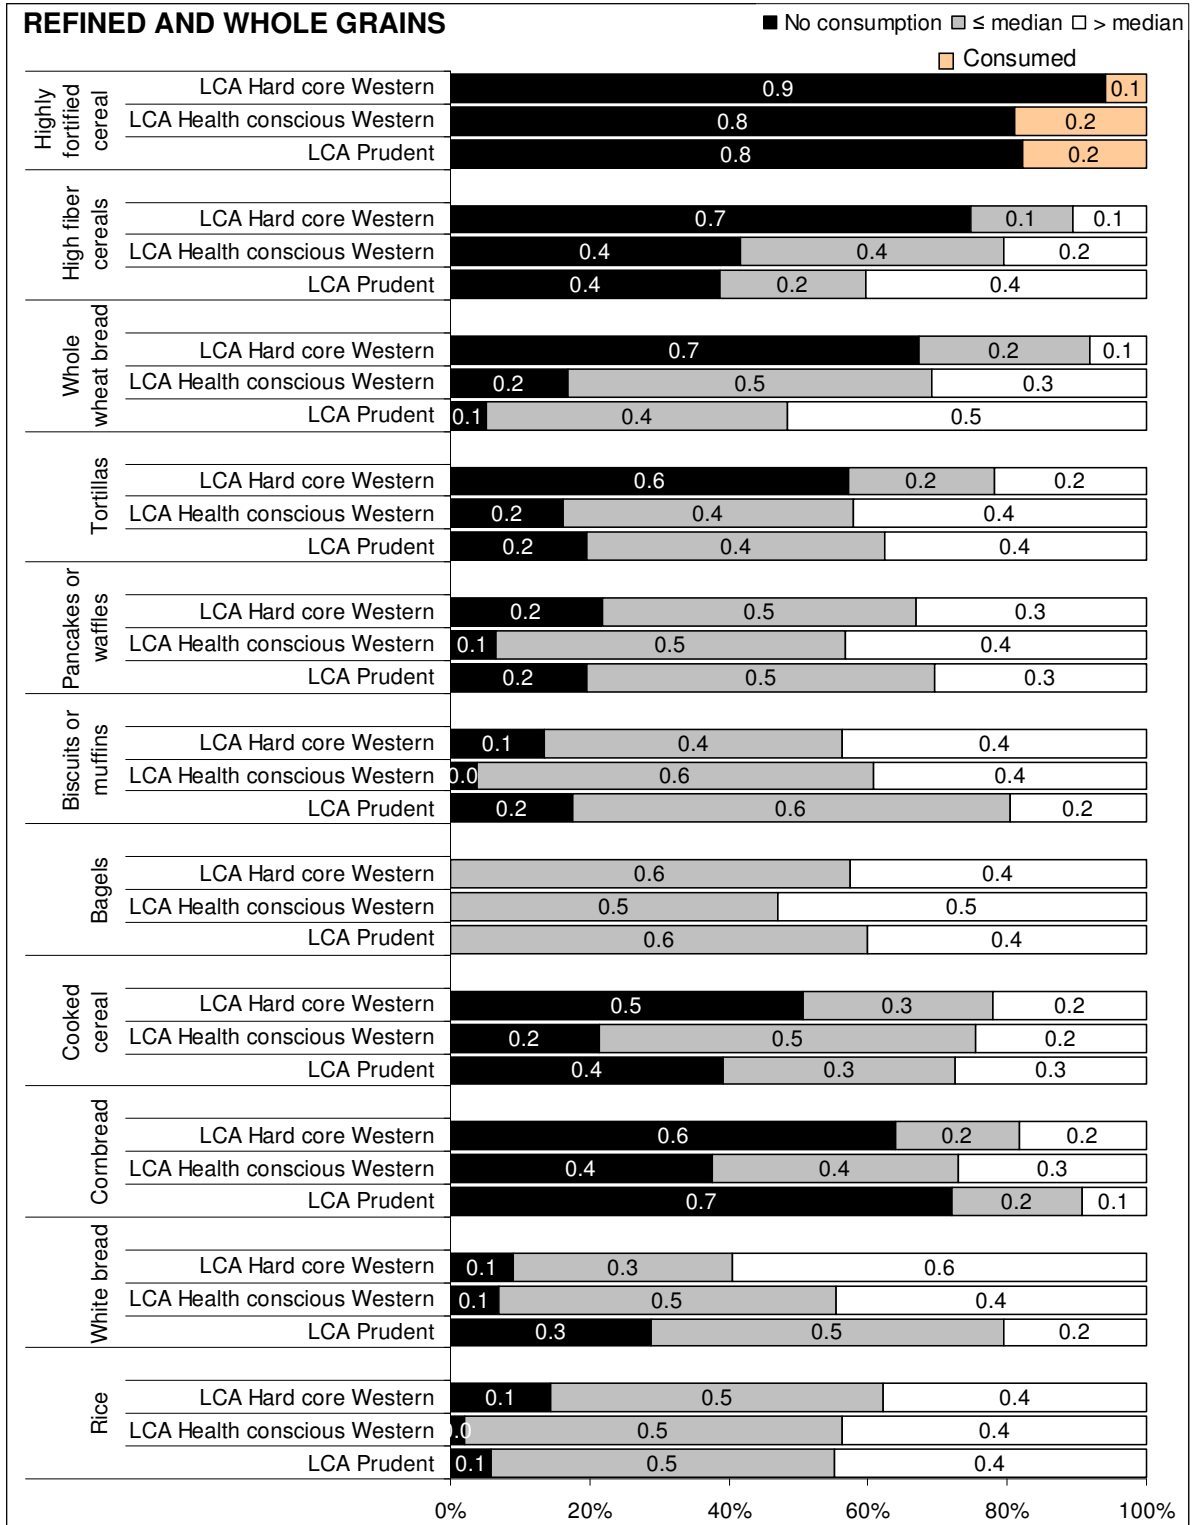

# Online Supporting Material

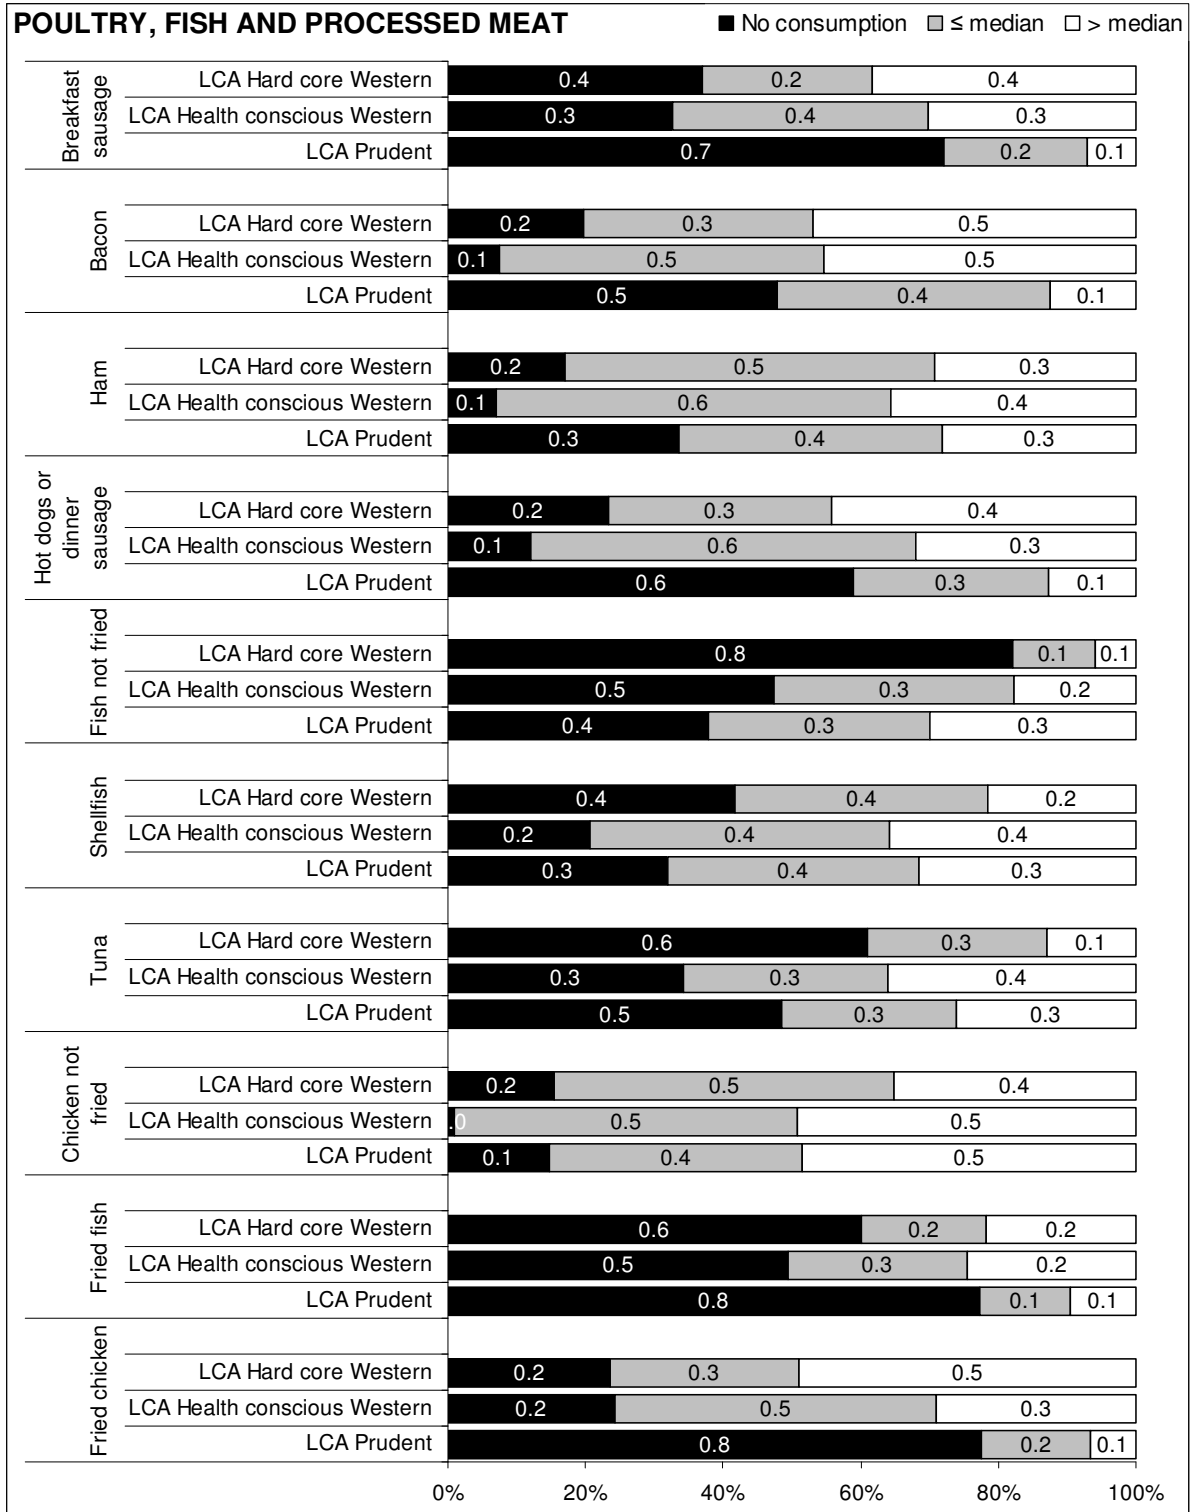



# Online Supporting Material

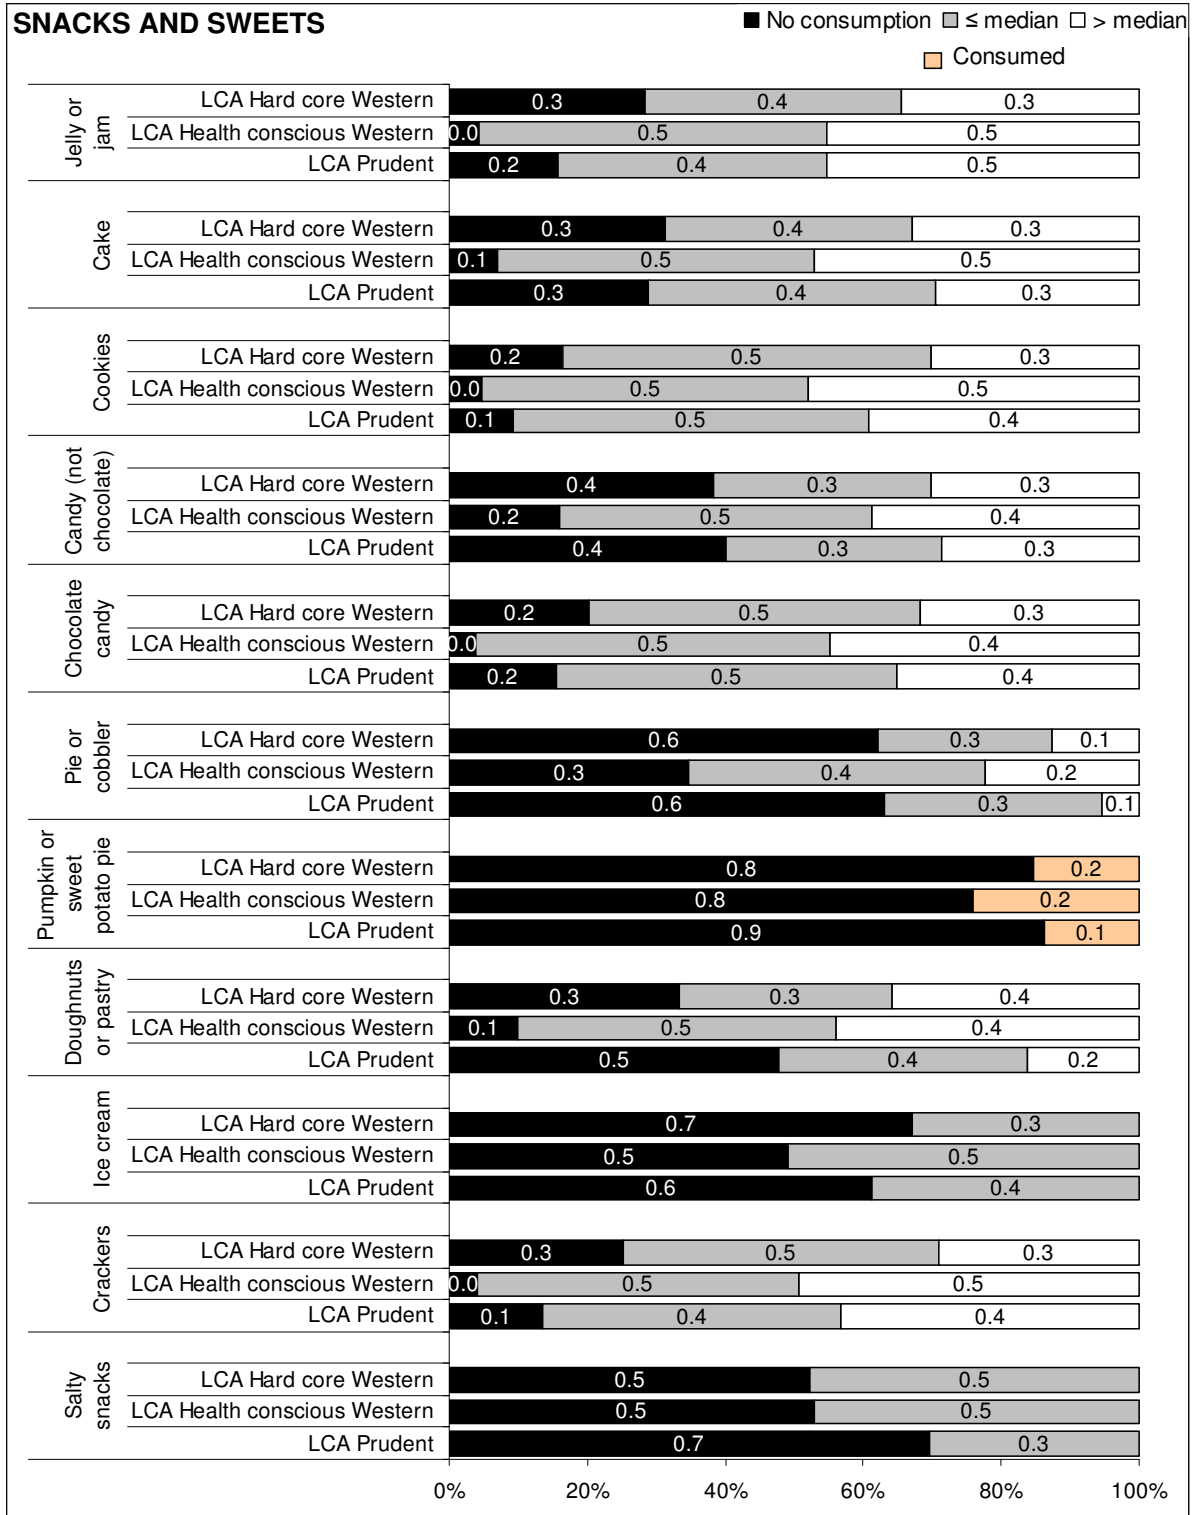

# Online Supporting Material

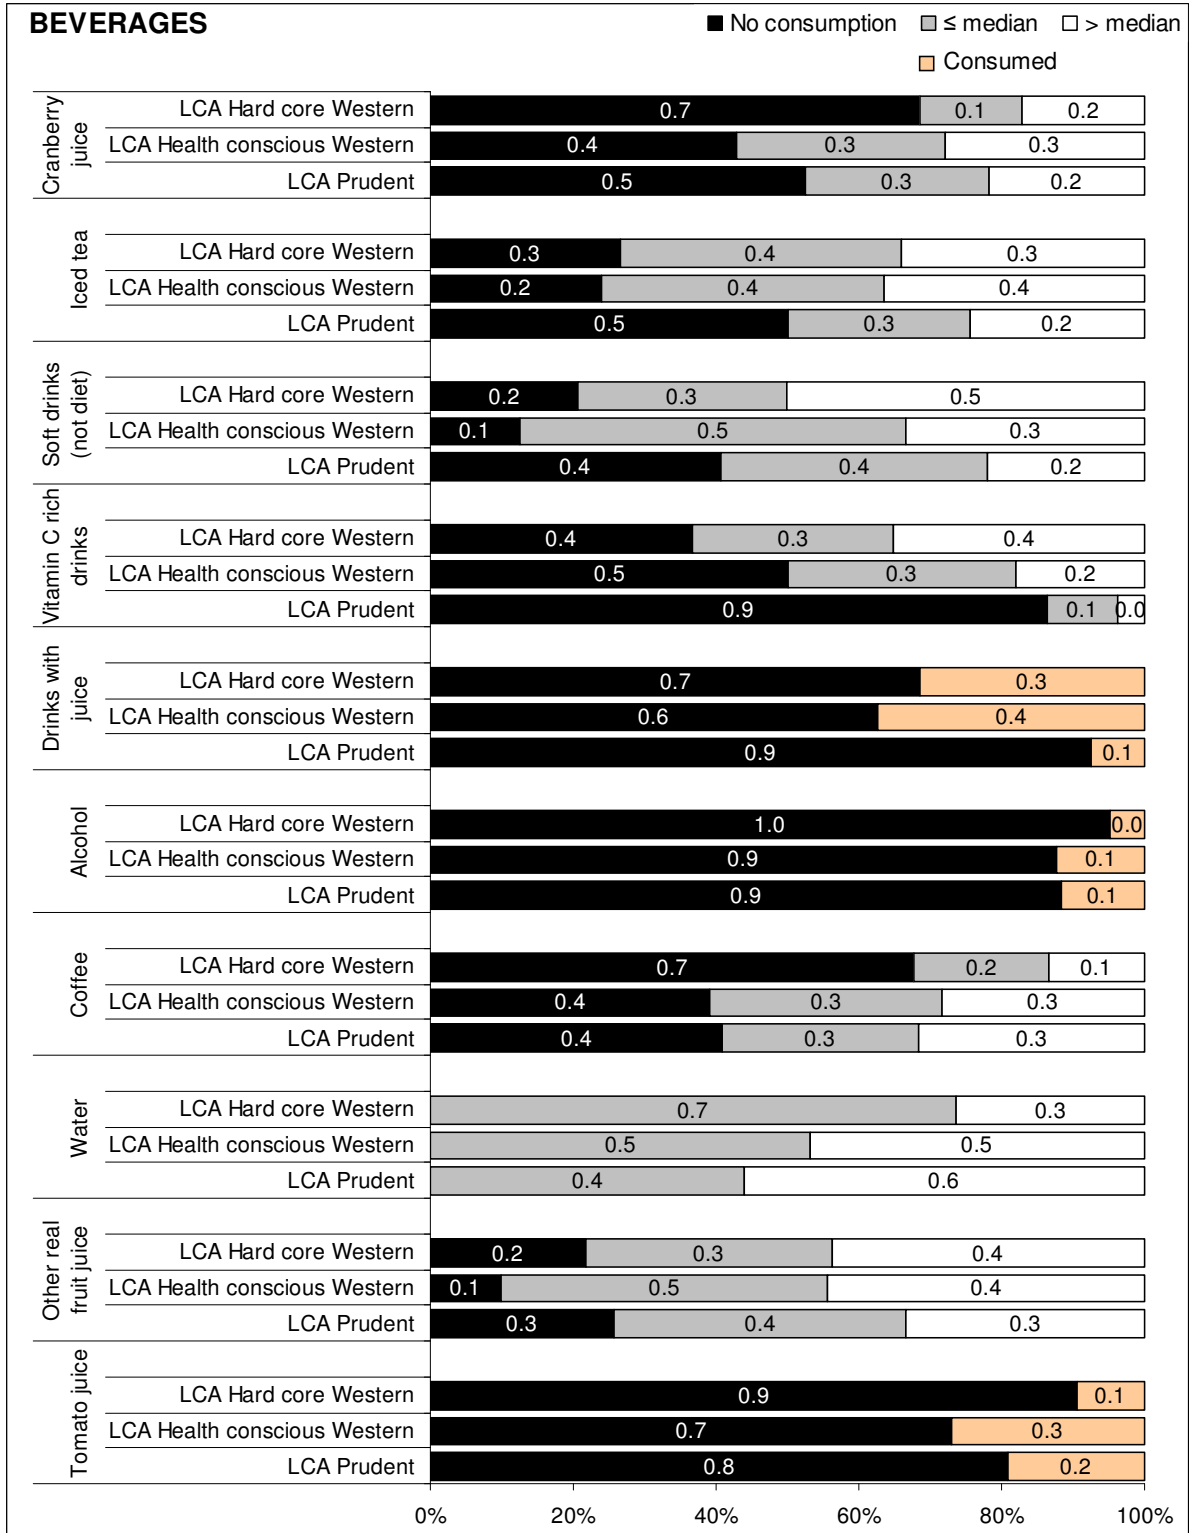

# Online Supporting Material

## FAST FOODS AND CONDIMENTS

■ No consumption    ■ ≤ median    □ > median

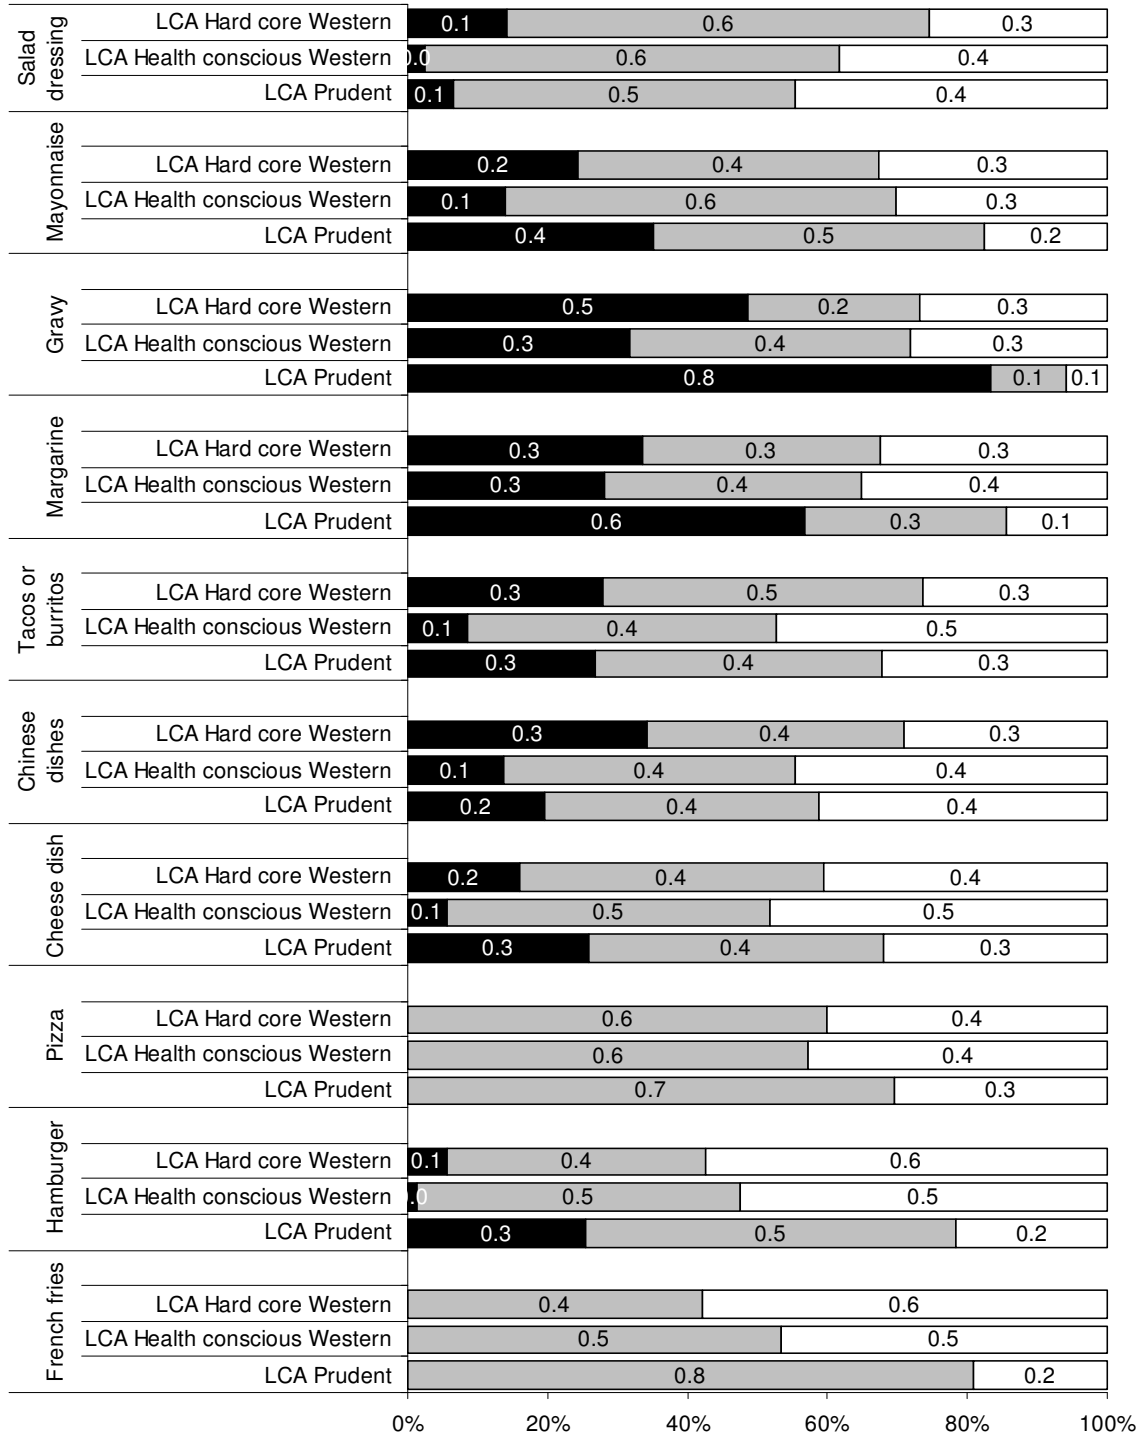

Supplement: supp_jn.110.124909_nut124909_T01.pdf [file supp_jn.110.124909_nut124909_T01.pdf]
